# Supplementary material for: Utility of Newborn Dried Blood Spots to Ascertain Seroprevalence of SARS-CoV-2 Antibodies Among Individuals Giving Birth in New York State, November 2019 to November 2021
Source: PubMed Central journal article supplement (PMC9396364; doi:10.1001/jamanetworkopen.2022.27995), 2022-08-22

## Supplementary Online Content

Damjanovic A, Styer LM, Nemeth K, et al. Utility of newborn dried blood spots to ascertain seroprevalence of SARS-CoV-2 antibodies among individuals giving birth in New York State, November 2019 to November 2021. *JAMA Netw Open.* 2022;5(8):e2227995.  
doi:10.1001/jamanetworkopen.2022.27995

**eFigure.** Map of 10 New York State Regions Used for SARS-CoV-2 Seroprevalence Analysis

This supplementary material has been provided by the authors to give readers additional information about their work.

**eFigure.** Map of 10 New York State Regions Used for SARS-CoV-2 Seroprevalence Analysis

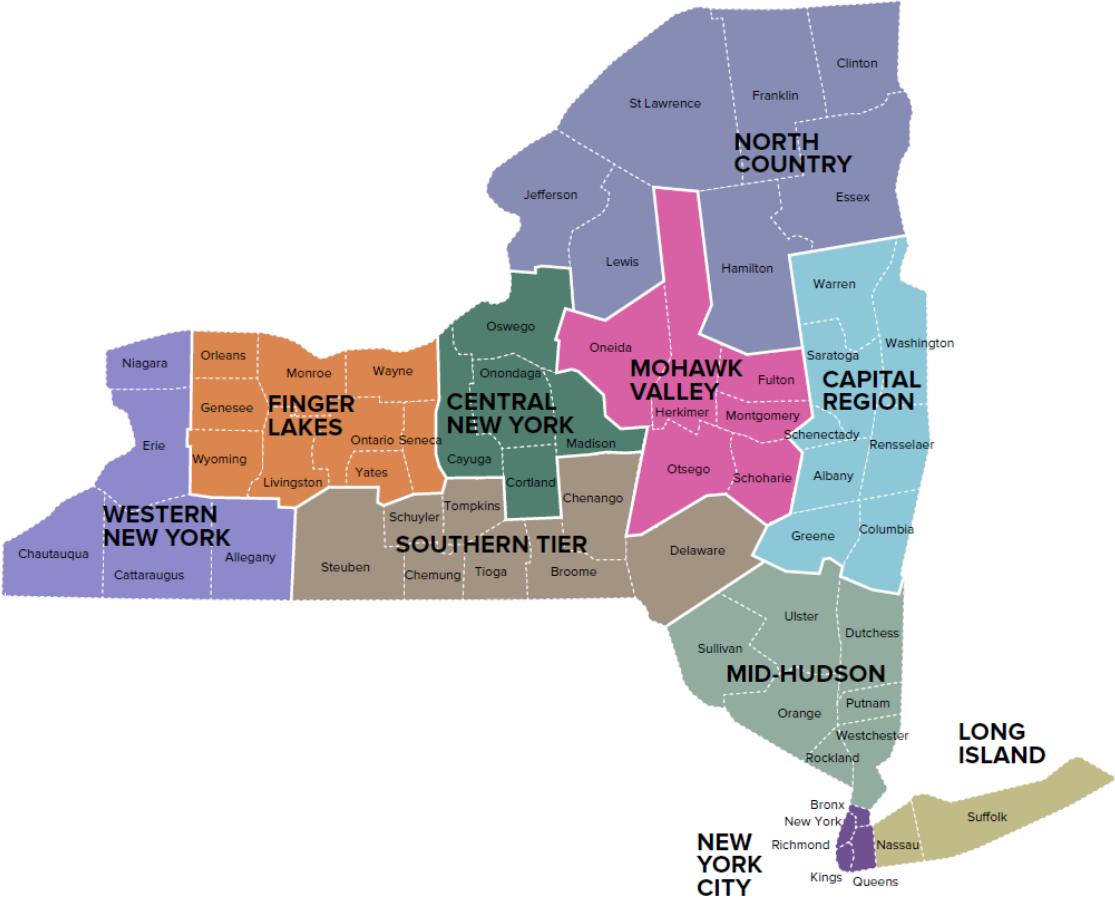

Supplement: jamanetwopen-e2227995-s001.pdf [file jamanetwopen-e2227995-s001.pdf]
